# Supplementary material for: Photocatalytic Removal of Pharmaceuticals from Greywater
Source: MDPI journal article supplement (doi:10.3390/catal11091125), 2021-09-18
Supplement: s1 [file s1]

## Supplementary materials

### Photocatalytic removal of pharmaceuticals from greywater

Bukola Ojobe, Radek Zouzelka, Barbora Satkova, Magdalena Vagnerova, Alzbeta Nemeskalova, Martin Kuchar, Jan Bartacek and Jiri Rathousky

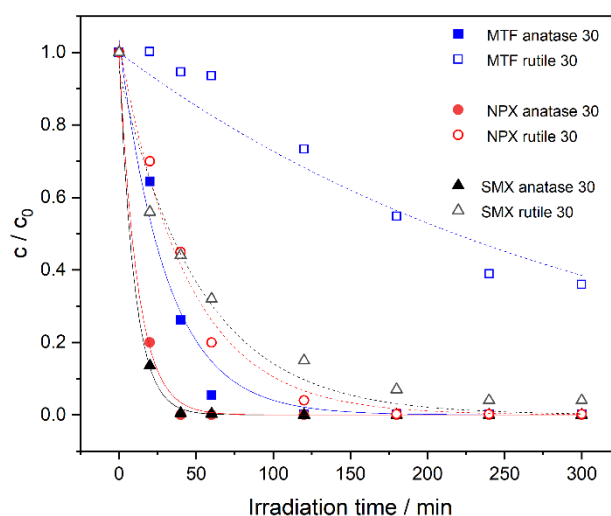

**Figure S1.** Kinetics of photocatalytic degradation of metformin (MTF), naproxene (NPX) and sulfomethaxazole (SMX) carried out in the suspension of anatase and rutile 30 nm nanoparticles.

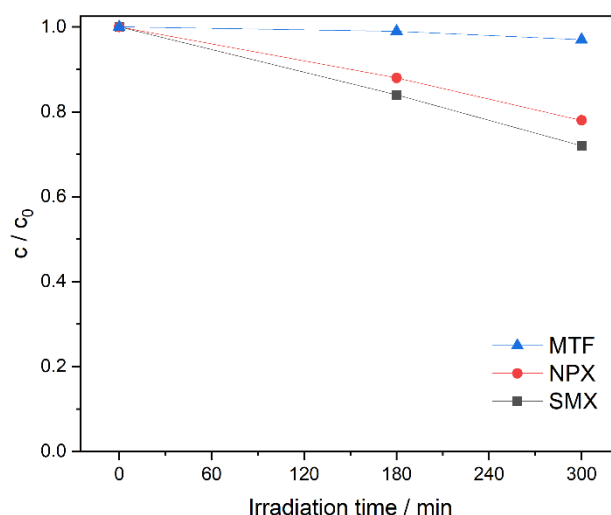

**Figure S2.** UV-A photolysis of metformin (MTF), naproxene (NPX) and sulfomethaxazole (SMX).
